# Supplementary material
Source: PubMed Central journal article supplement (PMC2787140)
Supplement: 0902213106_0902213106SI.pdf [file 0902213106_0902213106SI.pdf]

# Supporting Information

Ahmed et al. 10.1073/pnas.0902213106

## SI Text

**Genetic Diversity.** Departures from Hardy-Weinberg expectations and linkage disequilibrium were estimated using Genepop 3.4 (1) with sequential Bonferroni correction applied to adjust the critical probability for multiple comparisons. Four of the six loci showed significant departure from Hardy-Weinberg expectations (Table S5). The possibility of allelic drop-out or the presence of null alleles was tested using the program MICRO-CHECKER (2), which detects nulls by comparison of the observed allele frequencies rather than genotype frequencies expected under Hardy-Weinberg equilibrium. Using this software, only one locus, *Fsyc13*, was suggested to have null alleles present. Large-allele drop-out was not detected and was considered unlikely because the largest allele was 301 bp and allele size ranges were narrow for all loci.

The overall positive  $F_{IS}$  value indicates that there was inbreeding present in the adult population. This value can be used to estimate a rate of inbreeding in the population of  $\approx 5\%$  from  $F_{IS} = S/(2-S)$  (3), where  $S$  is the proportion of offspring produced by selfing (excluding locus *Fsyc13*). Although we did not see any evidence of selfing in the progeny that we collected, it could be that selfing is more common in the summer season, when fruit crops are larger and less synchronized than in the winter, when our sample was collected. Furthermore, the observed  $F_{IS}$  value was derived from the adult population and so may reflect past inbreeding, which is not reflected in the present mating pattern. No significant linkage disequilibria were detected among the six loci (see Table S5) used in this study.

**Paternity Analysis.** The paternity analyses we performed in the program CERVUS 2 (4). We used the option for paternity assignment where one parent is known: as we had collected the seeds directly from the trees, we could be confident of the

mother. Three out of 94 seedlings, all offspring of mother 1, were mismatched with the mother at *Fsyc 6* (mother genotype for *Fsyc 6*: 193 homozygote, three mismatching offspring genotypes for *Fsyc 6*: 180/189, 170/175, 171/180). As we were not certain whether the mismatches were a result of scoring errors or incorrect maternal labeling, they were omitted from the paternity analysis. No other mother-offspring mismatches were observed. However, had these three been included, this would indicate a scoring error rate of 0.54%. Therefore, we investigated the effect of applying an error rate of between 0 and 0.54%, and we observed no change in paternity assignment.

The critical LOD score in CERVUS was estimated by simulation of offspring data given the parental allele frequencies. The program generates two parents from the allele frequencies supplied, as well as a number of unrelated individuals and an offspring. The likelihood ratio is then calculated comparing the true simulated parent with the other candidate parents. This simulation was repeated for 5 sets of 1,000,000 offspring to give a critical LOD score, which must be achieved to assign paternity. Other parameters considered in the simulation are the scoring error rates and the proportion of sampled parents. We varied the error rate as described above, and we set the proportion of candidate parents sampled at 80%; this was considered conservative because we sampled all accessible trees in the study area, the most upstream maternal tree was  $\approx 50$  km from the end of our study site, and there were no trees in the remaining 10 km of the study site upstream of the last tree identified.

**Simulation of Directional Dispersal.** We simulated the expected distribution of paternities under panmixia by drawing the observed number of mothers at random from the total set of 79 sampled adult trees and then assigning paternities at random (excluding self-fertilization) to give the observed numbers of offspring per mother. Fathers could be up or down river of the mothers and simulations included 1,000 random draws.

1. Raymond M, Rousset F (1995) Genepop (Version-1.2)—Population genetics software for exact tests and ecumenicism. *J Hered* 86:248–249.
2. Van Oosterhout C, Hutchinson WF, Wills DPM, Shipley P (2004) MICRO-CHECKER: Software for identifying and correcting genotyping errors in microsatellite data. *Mol Ecol Notes* 4:535–538.

3. Hedrick PW (2004) *Genetics of Populations* (Jones and Bartlett, Sudbury) 3rd Ed, p 737.
4. Marshall TC, Slate J, Kruuk EB, Pemberton JM (1998) Statistical confidence for likelihood-based paternity inference in natural populations. *Mol Ecol* 7:637–655.

Table S1. Locations of *Ficus sycomorus* trees in the Ugab study site

| Tree ID | River location    | South   |         | East    |         |
|---------|-------------------|---------|---------|---------|---------|
|         |                   | Degrees | Minutes | Degrees | Minutes |
| 1       | Ugab              | 21      | 9.034   | 13      | 41.960  |
| 2       | Ugab              | 20      | 59.472  | 14      | 28.004  |
| 3       | Ugab              | 20      | 59.124  | 14      | 29.068  |
| 4       | Ugab              | 20      | 58.953  | 14      | 30.036  |
| 5       | Ugab              | 20      | 59.185  | 14      | 30.905  |
| 6       | Ugab              | 20      | 58.552  | 14      | 31.321  |
| 7       | Ugab              | 20      | 58.502  | 14      | 32.089  |
| 8       | Ugab              | 21      | 0.805   | 14      | 41.380  |
| 9       | White Lady        | 21      | 6.239   | 14      | 39.993  |
| 10      | White Lady        | 21      | 6.400   | 14      | 39.980  |
| 11      | White Lady        | 21      | 6.500   | 14      | 39.830  |
| 12      | White Lady        | 21      | 6.560   | 14      | 39.745  |
| 13      | White Lady        | 21      | 6.620   | 14      | 39.660  |
| 14      | White Lady        | 21      | 6.620   | 14      | 39.650  |
| 15      | White Lady        | 21      | 6.640   | 14      | 39.630  |
| 16      | White Lady        | 21      | 6.657   | 14      | 39.581  |
| 17      | White Lady        | 21      | 6.680   | 14      | 39.550  |
| 18      | White Lady        | 21      | 6.693   | 14      | 39.534  |
| 19      | White Lady        | 21      | 6.693   | 14      | 39.534  |
| 20      | White Lady        | 21      | 6.700   | 14      | 39.515  |
| 21      | Ugab              | 21      | 0.726   | 14      | 43.177  |
| 22      | Ugab              | 21      | 0.470   | 14      | 44.429  |
| 23–25   | Ugab              | 21      | 0.483   | 14      | 44.514  |
| 26      | Ugab              | 21      | 0.430   | 14      | 44.663  |
| 27      | Ugab              | 21      | 0.346   | 14      | 44.774  |
| 28      | Ugab              | 21      | 0.251   | 14      | 44.980  |
| 29      | Ugab              | 21      | 0.300   | 14      | 45.383  |
| 30      | Ugab              | 20      | 58.643  | 14      | 49.069  |
| 31      | Ugab              | 20      | 57.057  | 14      | 50.176  |
| 32      | Ugab              | 20      | 55.730  | 14      | 52.767  |
| 33      | Ugab              | 20      | 55.364  | 14      | 52.913  |
| 34      | Ugab              | 20      | 54.964  | 14      | 54.445  |
| 35      | Ugab              | 20      | 54.969  | 14      | 54.451  |
| 36–37   | Ugab              | 20      | 55.062  | 14      | 55.596  |
| 38      | Ugab              | 20      | 54.091  | 14      | 55.531  |
| 39      | Ugab              | 20      | 52.649  | 14      | 57.458  |
| 40      | Ugab              | 20      | 51.534  | 14      | 58.758  |
| 41      | Ugab              | 20      | 51.510  | 14      | 58.941  |
| 42–43   | Ugab              | 20      | 49.155  | 15      | 1.041   |
| 44–45   | Ugab              | 20      | 48.576  | 15      | 2.229   |
| 46      | Ugab              | 20      | 48.048  | 15      | 2.578   |
| 47      | Ugab              | 20      | 47.763  | 15      | 3.020   |
| 48      | Ugab              | 20      | 47.279  | 15      | 4.459   |
| 49–50   | Ugab              | 20      | 44.972  | 15      | 7.670   |
| 51      | Ugab              | 20      | 43.597  | 15      | 9.520   |
| 52–53   | Ugab              | 20      | 43.426  | 15      | 9.684   |
| 54–55   | Ugab              | 20      | 43.333  | 15      | 9.779   |
| 56      | Ugab              | 20      | 43.033  | 15      | 9.563   |
| 57–60   | Ugab              | 20      | 42.291  | 15      | 10.289  |
| 61–73   | Ugab              | 20      | 41.602  | 15      | 10.759  |
| 74–75   | Ugab              | 20      | 41.126  | 15      | 10.934  |
| 76      | Ugab              | 20      | 41.006  | 15      | 11.035  |
| 77      | Ugab              | 20      | 40.419  | 15      | 11.980  |
| 78      | Ugab              | 20      | 40.358  | 15      | 12.123  |
| 79      | Ugab              | 20      | 40.007  | 15      | 12.699  |
| end     | Omaowa settlement | 20      | 38.500  | 15      | 16.000  |

Tree identification numbers are indicated along with river location. South and East coordinates are shown in degrees and minutes.

Table S2. Genotypes of adult trees

| Tree ID | MFC 2    |          | Fsync02  |          | Fsync06  |          | Fsync08  |          | Fsync09  |          | Fsync13  |          |
|---------|----------|----------|----------|----------|----------|----------|----------|----------|----------|----------|----------|----------|
|         | Allele 1 | Allele 2 |
| 1       | 158      | 174      | 173      | 182      | 193      | 193      | 195      | 195      | 195      | 203      | 301      | 301      |
| 2       | 158      | 174      | 145      | 180      | 189      | 193      | 195      | 195      | 185      | 203      | 293      | 301      |
| 3       | 158      | 158      | 180      | 182      | 189      | 193      | 195      | 239      | 185      | 195      | 301      | 301      |
| 4       | 164      | 174      | 145      | 173      | 193      | 193      | 195      | 203      | 195      | 203      | 293      | 301      |
| 5       | 176      | 184      | 180      | 186      | 171      | 171      | 239      | 250      | 195      | 195      | 301      | 301      |
| 6       | 148      | 174      | 173      | 180      | 175      | 193      | 195      | 195      | 195      | 195      | 301      | 301      |
| 7       | 158      | 170      | 180      | 182      | 180      | 193      | 207      | 239      | 195      | 195      | 293      | 301      |
| 8       | 148      | 158      | 180      | 180      | 173      | 180      | 199      | 219      | 195      | 195      | 293      | 293      |
| 9       | 170      | 178      | 173      | 173      | 180      | 180      | 195      | 195      | 195      | 197      | 301      | 301      |
| 10      | 148      | 158      | 180      | 180      | 171      | 180      | 195      | 195      | 195      | 195      | 293      | 293      |
| 11      | 150      | 168      | 173      | 173      | 171      | 180      | 203      | 203      | 195      | 195      | 293      | 301      |
| 12      | 154      | 164      | 173      | 173      | 171      | 180      | 239      | 247      | 195      | 195      | 301      | 301      |
| 13      | 158      | 178      | 173      | 173      | 180      | 193      | 239      | 247      | 195      | 203      | 301      | 301      |
| 14      | 162      | 178      | 173      | 173      | 171      | 189      | 247      | 247      | 195      | 195      | 293      | 293      |
| 15      | 158      | 166      | 173      | 182      | 189      | 193      | 195      | 195      | 185      | 197      | 293      | 293      |
| 16      | 154      | 174      | 173      | 180      | 180      | 189      | 199      | 207      | 195      | 195      | 293      | 293      |
| 17      | 154      | 174      | 173      | 173      | 171      | 189      | 239      | 243      | 185      | 195      | 293      | 301      |
| 18      | -1       | -1       | -1       | 182      | -1       | -1       | -1       | -1       | 195      | 195      | 301      | 301      |
| 19      | 174      | 186      | 173      | 180      | 195      | 195      | 203      | 219      | 195      | 195      | 293      | 301      |
| 20      | 154      | 158      | 173      | 173      | 180      | 193      | 197      | 239      | 187      | 187      | 293      | 301      |
| 21      | 145      | 154      | 173      | 180      | 189      | 197      | 195      | 195      | 185      | 195      | 301      | 301      |
| 22      | 162      | 170      | 173      | 173      | 189      | 189      | 195      | 203      | 195      | 197      | 301      | 301      |
| 23      | 158      | 168      | 173      | 180      | 189      | 193      | 195      | 203      | 195      | 195      | 297      | 301      |
| 24      | 148      | 158      | 145      | 182      | 180      | 193      | 195      | 195      | 195      | 195      | 297      | 301      |
| 25      | 148      | 166      | 173      | 173      | 171      | 189      | 239      | 247      | 185      | 195      | 301      | 301      |
| 26      | 158      | 174      | 173      | 173      | 171      | 171      | 195      | 203      | 185      | 195      | 293      | 293      |
| 27      | 174      | 174      | 160      | 173      | 175      | 189      | 239      | 247      | 195      | 197      | 293      | 297      |
| 28      | 148      | 158      | 173      | 180      | 180      | 189      | 239      | 258      | 195      | 195      | 301      | 301      |
| 29      | 158      | 174      | 173      | 180      | 171      | 180      | 195      | 195      | 195      | 195      | 301      | 301      |
| 30      | 160      | 162      | 173      | 173      | 180      | 189      | 195      | 247      | 195      | 197      | 301      | 301      |
| 31      | 154      | 166      | 173      | 186      | 189      | 193      | 243      | 250      | 195      | 195      | 293      | 301      |
| 32      | 150      | 166      | 173      | 173      | 171      | 189      | 203      | 247      | 185      | 195      | 301      | 301      |
| 33      | 166      | 176      | 173      | 180      | 171      | 171      | 195      | 239      | 185      | 195      | 301      | 301      |
| 34      | 158      | 174      | 173      | 173      | 171      | 189      | 195      | 239      | 195      | 195      | 301      | 301      |
| 35      | 158      | 178      | 173      | 173      | 171      | 193      | 195      | 199      | 195      | 197      | 297      | 301      |
| 36      | 158      | 176      | 145      | 182      | 171      | 189      | 195      | 247      | 185      | 195      | 301      | 301      |
| 37      | 154      | 162      | 180      | 182      | 171      | 193      | 195      | 247      | 197      | 197      | 297      | 301      |
| 38      | 172      | 172      | 160      | 173      | 175      | 189      | 239      | 247      | 195      | 197      | 293      | 297      |
| 39      | 154      | 168      | 173      | 180      | 189      | 201      | 199      | 203      | 185      | 195      | 293      | 301      |
| 40      | 162      | 176      | 160      | 173      | 175      | 189      | 203      | 203      | 195      | 197      | 293      | 301      |
| 41      | 148      | 174      | 180      | 186      | 171      | 175      | 195      | 203      | 195      | 195      | 301      | 301      |
| 42      | 148      | 162      | 173      | 173      | 195      | 195      | 203      | 203      | 195      | 206      | 297      | 301      |
| 43      | 154      | 164      | 173      | 186      | 171      | 180      | 239      | 247      | 195      | 195      | 293      | 293      |
| 44      | 162      | 162      | 180      | 180      | 171      | 171      | 195      | 235      | 185      | 195      | 293      | 301      |
| 45      | 158      | 178      | 180      | 182      | 180      | 189      | 239      | 258      | 195      | 195      | 301      | 301      |
| 46      | 174      | 174      | 173      | 186      | 171      | 180      | 195      | 247      | 195      | 195      | 297      | 301      |
| 47      | 168      | 184      | 145      | 182      | 171      | 175      | 239      | 247      | 185      | 195      | 293      | 293      |
| 48      | 148      | 158      | 173      | 180      | 177      | 180      | 195      | 247      | 195      | 197      | 297      | 301      |
| 49      | 158      | 180      | 180      | 180      | 193      | 193      | 239      | 247      | 190      | 195      | 293      | 301      |
| 50      | 148      | 162      | 173      | 180      | 171      | 201      | 239      | 247      | 195      | 197      | 301      | 301      |
| 51      | 154      | 180      | 160      | 173      | 171      | 180      | 195      | 239      | 195      | 197      | 297      | 297      |
| 52      | 148      | 154      | 173      | 180      | 171      | 189      | 195      | 195      | 195      | 195      | 297      | 301      |
| 53      | 148      | 158      | 145      | 173      | 180      | 193      | 243      | 247      | 195      | 197      | 297      | 301      |
| 54      | 148      | 158      | 173      | 173      | 180      | 189      | 239      | 239      | 195      | 203      | 301      | 301      |
| 55      | 166      | 176      | 173      | 182      | 175      | 189      | 195      | 247      | 195      | 203      | 297      | 301      |
| 56      | 174      | 174      | 173      | 180      | 171      | 171      | 235      | 235      | 195      | 195      | 293      | 301      |
| 57      | 172      | 188      | 173      | 180      | -1       | -1       | 195      | 203      | 195      | 197      | 293      | 301      |
| 58      | 178      | 180      | 173      | 186      | 189      | 193      | 239      | 247      | 185      | 197      | 301      | 301      |
| 59      | 172      | 174      | 173      | 173      | 171      | 180      | 239      | 239      | 195      | 195      | 297      | 301      |
| 60      | 166      | 178      | 173      | 180      | 189      | 193      | 207      | 239      | 195      | 203      | 293      | 297      |
| 61      | 148      | 174      | 145      | 173      | 189      | 189      | 195      | 239      | 185      | 195      | 301      | 301      |
| 62      | 142      | 142      | 165      | 173      | 175      | 175      | 195      | 239      | 195      | 203      | 282      | 282      |
| 63      | 148      | 188      | 173      | 173      | 171      | 180      | 195      | 239      | 195      | 195      | 301      | 301      |

| Tree ID | <i>MFC 2</i> |          | <i>Fsyc02</i> |          | <i>Fsyc06</i> |          | <i>Fsyc08</i> |          | <i>Fsyc09</i> |          | <i>Fsyc13</i> |          |
|---------|--------------|----------|---------------|----------|---------------|----------|---------------|----------|---------------|----------|---------------|----------|
|         | Allele 1     | Allele 2 | Allele 1      | Allele 2 | Allele 1      | Allele 2 | Allele 1      | Allele 2 | Allele 1      | Allele 2 | Allele 1      | Allele 2 |
| 64      | 178          | 178      | 173           | 173      | 180           | 201      | 195           | 247      | 195           | 195      | 293           | 297      |
| 65      | 180          | 182      | 160           | 173      | 180           | 189      | 195           | 195      | 195           | 195      | 293           | 293      |
| 66      | 158          | 180      | 173           | 173      | 171           | 180      | 195           | 247      | 195           | 203      | 293           | 293      |
| 67      | 174          | 174      | 145           | 180      | 180           | 189      | 195           | 203      | 185           | 195      | 293           | 301      |
| 68      | 158          | 166      | 173           | 182      | 171           | 171      | 195           | 203      | 185           | 195      | 282           | 282      |
| 69      | 174          | 176      | 145           | 173      | 180           | 189      | 199           | 203      | 185           | 195      | 301           | 301      |
| 70      | 182          | 182      | 173           | 173      | 189           | 189      | 195           | 203      | 195           | 195      | 293           | 301      |
| 71      | 178          | 178      | 173           | 180      | 171           | 180      | 203           | 247      | 195           | 195      | 293           | 301      |
| 72      | 174          | 184      | 145           | 173      | 189           | 189      | 239           | 247      | 195           | 197      | 293           | 301      |
| 73      | 178          | 178      | 173           | 180      | 175           | 175      | 203           | 247      | 195           | 197      | 293           | 301      |
| 74      | 148          | 168      | 173           | 173      | 180           | 180      | 195           | 239      | 195           | 195      | 293           | 297      |
| 75      | 148          | 158      | 173           | 173      | 180           | 189      | 195           | 203      | 195           | 195      | 301           | 301      |
| 76      | 148          | 160      | 173           | 182      | 171           | 171      | 235           | 239      | 195           | 195      | 301           | 301      |
| 77      | 148          | 158      | 173           | 180      | 177           | 195      | 195           | 195      | 195           | 197      | 301           | 301      |
| 78      | 154          | 166      | 173           | 180      | 171           | 177      | 239           | 247      | 195           | 195      | 297           | 301      |
| 79      | 168          | 178      | 173           | 180      | 193           | 193      | 247           | 247      | 195           | 195      | 293           | 293      |

Tree identification numbers are indicated. The six microsatellite loci used in the study are identified, with the sequence-length identity of allele 1 and allele 2 present in each individual. Missing data are denoted by –.

**Table S3. Genotypes of offspring**

| Mother ID | Offspring ID | MFC2     |          | Fsync02 |          | Fsync06  |          | Fsync08  |          | Fsync09  |          | Fsync13  |          |
|-----------|--------------|----------|----------|---------|----------|----------|----------|----------|----------|----------|----------|----------|----------|
|           |              | Allele 1 | Allele 2 | Allele1 | Allele 2 | Allele 1 | Allele 2 |
| 1         | 1.111        | 170      | 174      | 180     | 182      | 193      | 193      | 195      | 203      | 195      | 195      | 301      | 301      |
| 1         | 1.1141       | 158      | 162      | 173     | 173      | 171      | 193      | 195      | 203      | 185      | 203      | 301      | 301      |
| 1         | 1.1171       | 145      | 174      | 173     | 173      | 193      | 193      | 195      | 203      | 195      | 203      | 301      | 301      |
| 1         | 1.121        | 158      | 158      | 173     | 180      | 193      | 193      | 195      | 195      | 195      | 203      | 301      | 301      |
| 1         | 1.211        | 158      | 158      | 173     | 182      | 171      | 193      | 195      | 195      | 195      | 203      | 301      | 301      |
| 1         | 1.221        | 158      | 178      | 173     | 173      | 171      | 193      | 195      | 203      | 195      | 195      | 301      | 301      |
| 1         | 1.331        | 174      | 174      | 173     | 182      | 171      | 193      | 195      | 203      | 195      | 195      | 301      | 301      |
| 1         | 1.431        | 148      | 158      | 173     | 186      | 171      | 193      | 195      | 247      | 195      | 195      | 301      | 301      |
| 1         | 1.441        | 148      | 158      | 182     | 186      | 171      | 193      | 195      | 247      | 185      | 195      | 301      | 301      |
| 1         | 1.511        | 158      | 170      | 182     | 182      | 171      | 193      | 195      | 247      | 195      | 195      | 301      | 301      |
| 1         | 1.551        | 148      | 158      | 173     | 186      | 171      | 193      | 195      | 195      | 195      | 195      | 301      | 301      |
| 1         | 1.561        | 148      | 158      | 173     | 186      | 171      | 193      | 195      | 247      | 195      | 203      | 301      | 301      |
| 1         | 1.33         | 174      | 178      | 173     | 182      | 171      | 193      | 195      | 203      | 195      | 195      | 301      | 301      |
| 1         | 1.37         | 148      | 158      | 173     | 182      | 171      | 193      | 195      | 195      | 195      | 195      | 301      | 301      |
| 1         | 1.31         | 158      | 158      | 173     | 180      | 180      | 193      | 195      | 239      | 195      | 195      | 297      | 301      |
| 1         | 1.312        | 158      | 166      | 182     | 182      | 180      | 193      | 195      | 195      | 195      | 195      | 301      | 301      |
| 1         | 1.311        | 158      | 182      | 173     | 182      | -1       | -1       | 195      | 203      | 195      | 203      | 297      | 301      |
| 1         | 1.32         | 158      | 178      | 173     | 173      | 193      | 193      | 195      | 247      | 195      | 195      | 297      | 301      |
| 1         | 1.13         | 158      | 166      | 173     | 180      | 189      | 193      | 195      | 195      | 195      | 195      | 297      | 301      |
| 1         | 1.45         | 158      | 182      | 173     | 173      | 189      | 193      | 195      | 195      | 195      | 195      | 301      | 301      |
| 1         | 1.44         | 158      | 158      | 173     | 182      | 189      | 193      | 195      | 203      | 195      | 195      | 301      | 301      |
| 1         | 1.413        | 174      | 174      | 182     | 186      | 171      | 193      | 195      | 247      | 195      | 195      | 301      | 301      |
| 1         | 1.451        | 158      | 158      | 173     | 182      | 180      | 193      | 195      | 195      | 195      | 203      | 301      | 301      |
| 1         | 1.46         | 148      | 158      | 173     | 173      | 171      | 193      | 195      | 239      | 195      | 195      | 301      | 301      |
| 1         | 1.57         | 158      | 158      | 173     | 173      | 189      | 193      | 195      | 195      | 195      | 195      | 301      | 301      |
| 1         | 1.6          | 158      | 158      | 173     | 173      | 171      | 193      | 195      | 195      | 195      | 195      | 301      | 301      |
| 1         | 1.7          | 158      | 174      | 173     | 182      | 171      | 193      | 195      | 195      | 195      | 195      | 301      | 301      |
| 1         | 1.2.2        | 158      | 158      | 173     | 171      | 171      | 193      | 195      | 203      | 195      | 195      | 301      | 301      |
| 1         | 1.2.7        | 148      | 158      | 173     | 182      | 171      | 193      | 195      | 195      | 195      | 195      | 301      | 301      |
| 1         | 1.2.8        | 158      | 182      | 173     | 182      | 171      | 193      | 195      | 195      | 195      | 195      | 293      | 301      |
| 1         | 1.2.9        | 174      | 182      | 173     | 173      | 189      | 193      | 195      | 203      | 195      | 195      | 293      | 301      |
| 1         | 1.2.10       | 158      | 174      | 173     | 180      | 171      | 193      | 195      | 239      | 195      | 195      | 297      | 301      |
| 1         | 1.2.13       | 148      | 174      | 180     | 182      | 189      | 193      | 195      | 195      | 195      | 195      | 301      | 301      |
| 1         | 1.2.6        | 168      | 174      | 173     | 173      | 171      | 193      | 195      | 195      | 195      | 195      | 301      | 301      |
| 1         | 1.2.4        | 158      | 158      | 173     | 173      | 180      | 193      | 195      | 247      | 195      | 195      | 301      | 301      |
| 1         | 1.2          | 158      | 174      | 180     | 182      | 171      | 193      | 195      | 195      | 195      | 195      | 301      | 301      |
| 1         | 1.4.10       | 148      | 158      | 173     | 173      | 171      | 193      | 195      | 247      | 195      | 203      | 301      | 301      |
| 3         | 4.3.5        | 158      | 168      | 180     | 182      | 193      | 193      | 239      | 258      | 195      | 203      | 301      | 301      |
| 3         | 4.4.3        | 158      | 166      | 173     | 180      | 193      | -1       | 195      | 239      | 195      | 195      | 301      | 301      |
| 3         | 4.9.6        | 148      | 158      | 182     | 182      | 193      | 193      | 195      | 195      | 195      | 195      | -1       | -1       |
| 3         | 4.21         | 158      | 180      | 173     | 182      | 180      | 193      | 239      | 247      | 195      | 195      | 301      | 301      |
| 3         | 4.22         | 158      | 166      | 173     | 180      | 189      | 193      | 203      | 239      | 195      | 195      | 301      | 301      |
| 3         | 4.23         | 158      | 166      | 173     | 182      | 180      | 193      | 203      | 239      | 195      | 195      | 301      | 301      |
| 3         | 4.24         | 158      | 158      | 173     | 180      | 180      | 193      | 203      | 239      | 185      | 195      | 301      | 301      |
| 3         | 4.25         | 158      | 158      | 173     | 182      | 189      | 189      | 239      | 247      | 195      | 195      | 301      | 301      |
| 3         | 4.26         | 158      | 166      | 173     | 180      | 189      | 189      | 195      | 203      | 185      | 195      | 301      | 301      |
| 3         | 4.27         | 158      | 158      | 173     | 182      | 180      | 189      | 239      | 247      | 195      | -1       | 301      | 301      |
| 3         | 4.29         | 158      | 158      | 182     | 193      | 193      | 193      | 239      | 239      | 185      | 195      | 301      | 301      |
| 3         | 4.10.7       | 158      | 158      | 173     | 180      | 180      | 193      | -1       | -1       | 185      | 195      | 297      | 301      |
| 3         | 4.6.5        | 150      | 158      | 180     | 182      | 171      | 189      | 195      | 239      | 195      | 195      | 301      | 301      |
| 4         | 5.3          | 158      | 164      | 145     | 173      | 189      | 193      | 203      | 247      | 195      | 195      | 293      | 293      |
| 4         | 5.4.1        | 148      | 174      | 145     | 173      | 193      | 193      | 195      | 203      | 195      | 195      | -1       | -1       |
| 4         | 5.4.2        | 158      | 164      | 145     | 173      | 180      | 193      | 203      | 247      | 195      | 195      | 293      | 293      |
| 4         | 5.41         | 148      | 174      | 173     | 173      | 171      | 193      | 203      | 247      | 195      | 195      | 293      | 293      |
| 4         | 5.2          | -1       | -1       | 145     | 173      | 180      | 193      | 195      | 203      | 195      | 195      | 293      | 301      |
| 6         | 7.01         | 148      | 158      | 173     | 173      | 175      | 180      | 195      | 247      | 195      | 195      | 293      | 301      |
| 6         | 7.31         | 148      | 158      | 173     | 180      | 175      | 193      | 195      | 203      | 185      | 195      | 301      | 301      |
| 6         | 7.33         | 148      | 158      | 145     | 180      | 175      | 193      | 195      | 247      | -1       | -1       | 301      | 301      |
| 8         | 12.01        | 148      | 158      | 180     | 180      | 170      | 180      | 203      | 219      | 195      | 195      | 293      | 301      |
| 8         | 12.4         | 148      | 174      | 173     | 180      | 180      | 201      | 219      | 239      | 195      | 195      | 293      | 301      |
| 13        | 17.11        | 178      | 178      | 173     | 182      | 175      | 180      | 203      | 239      | 195      | 195      | 301      | 301      |
| 17        | 21.1         | 148      | 154      | 173     | 173      | 171      | 171      | 195      | 239      | 195      | 195      | 293      | 301      |
| 17        | 21.2         | 174      | 174      | 173     | 180      | 175      | 189      | 197      | 239      | 195      | 195      | 301      | 301      |

| Mother ID | Offspring ID | <i>MFC2</i> |          | <i>Fsyc02</i> |          | <i>Fsyc06</i> |          | <i>Fsyc08</i> |          | <i>Fsyc09</i> |          | <i>Fsyc13</i> |          |
|-----------|--------------|-------------|----------|---------------|----------|---------------|----------|---------------|----------|---------------|----------|---------------|----------|
|           |              | Allele 1    | Allele 2 | Allele1       | Allele 2 | Allele 1      | Allele 2 |
| 17        | 21.21        | 154         | 162      | 173           | 173      | 171           | 189      | 203           | 239      | 195           | 195      | 293           | 301      |
| 17        | 21.4         | 154         | 158      | 173           | 180      | 189           | 189      | 195           | 239      | 185           | 195      | 293           | 301      |
| 17        | 21.7         | 148         | 154      | 173           | 186      | 171           | 189      | 195           | 239      | 195           | 195      | 293           | 301      |
| 28        | 34.3         | 148         | 148      | 173           | 182      | 171           | 180      | 203           | 239      | 195           | 195      | 301           | 301      |
| 28        | 34.5         | 148         | 170      | 173           | 182      | 171           | 180      | 239           | 258      | 195           | 195      | 301           | 301      |
| 28        | 34.7         | 158         | 170      | 173           | 182      | 171           | 189      | 203           | 239      | 195           | 195      | 301           | 301      |
| 28        | 34.6         | 158         | 172      | 173           | 182      | 171           | 180      | 239           | 258      | 195           | 195      | 301           | 301      |
| 28        | 34.1         | 148         | 180      | 173           | 182      | 171           | 180      | 203           | 258      | 195           | 195      | 301           | 301      |
| 28        | 34.9         | 148         | 188      | 173           | 182      | 171           | 189      | 239           | 239      | 195           | 195      | 301           | 301      |
| 28        | 34.2         | 148         | 148      | 180           | 182      | 171           | 180      | 239           | 239      | 195           | 195      | 301           | 301      |
| 28        | 34.9.1       | 158         | 158      | 173           | 182      | 171           | 180      | 203           | 239      | 195           | 195      | 301           | 301      |
| 28        | 34.4.1       | 148         | 158      | 173           | 182      | 171           | 180      | 203           | 239      | 195           | 195      | 301           | 301      |
| 28        | 34.8         | 158         | 158      | 180           | 182      | 171           | 189      | 195           | 239      | 195           | 195      | 301           | 301      |
| 28        | 34.4.2       | 158         | 158      | 180           | 182      | 171           | 180      | 203           | 239      | 195           | 195      | 301           | 301      |
| 40        | 46.4.6       | 162         | 168      | 160           | 173      | −1            | −1       | 203           | 247      | 195           | 195      | 297           | 301      |
| 40        | 46.9.7       | 148         | 162      | 173           | 173      | 180           | 189      | 195           | 203      | 195           | 195      | −1            | −1       |
| 41        | 47.1.9       | 148         | 172      | 182           | 186      | 175           | 180      | 195           | 203      | 195           | 195      | 293           | 301      |
| 41        | 47.2.4       | 148         | 174      | 173           | 186      | 171           | 193      | 195           | 203      | 195           | 197      | 297           | 301      |
| 41        | 47.5.6       | 148         | 148      | 180           | 186      | 171           | 171      | 195           | 239      | 195           | 197      | 301           | 301      |
| 41        | 47.1.6       | 148         | 172      | 173           | 180      | 175           | 180      | 195           | 195      | 195           | 195      | 293           | 301      |
| 41        | 47.1.3       | 148         | 148      | 182           | 186      | 171           | 180      | 195           | 203      | 195           | 195      | 293           | 301      |
| 41        | 47.6.1       | 148         | 172      | 173           | 186      | 175           | 180      | 195           | 203      | 195           | 195      | 293           | 301      |
| 41        | 47.2.2       | 148         | 158      | 180           | 182      | 171           | 175      | 203           | 239      | 195           | 195      | 297           | 301      |
| 41        | 47.7.4       | −1          | −1       | 173           | 186      | 171           | 180      | 195           | 239      | 195           | 203      | 297           | 301      |
| 41        | 47.7.7       | 148         | 168      | 173           | 180      | 171           | 180      | 195           | 239      | 195           | 195      | 297           | 301      |
| 41        | 47.8.6       | −1          | −1       | 173           | 186      | 171           | 180      | 195           | 203      | 195           | 195      | 301           | 301      |
| 41        | 47.8.10      | −1          | −1       | 173           | 186      | 171           | 180      | 195           | 195      | 195           | 203      | 297           | 301      |

Tree identification numbers are indicated. The six loci microsatellite loci used in the study are identified, with the sequence-length identity of allele 1 and allele 2 present in each individual. Missing data are denoted by −1.

**Table S4. Paternity assignments made in CERVUS**

| Offspring ID | Mother ID | Father ID | Second parent NEP | Trio LOD | Trio C | D (km) |
|--------------|-----------|-----------|-------------------|----------|--------|--------|
| 1.46         | 1         | 76        | 2.12E-02          | 4.53E+00 | +      | 164.7  |
| 1.44         | 1         | 75        | 2.21E-02          | 4.44E+00 | +      | 163.8  |
| 1.221        | 1         | 71        | 1.13E-02          | 4.52E+00 | +      | 163.2  |
| 1.33         | 1         | 71        | 1.23E-02          | 4.38E+00 | +      | 163.2  |
| 1.37         | 1         | 63        | 3.46E-02          | 3.91E+00 | +      | 163.2  |
| 1.45         | 1         | 70        | 5.20E-03          | 6.61E+00 | *      | 163.2  |
| 1.2.7        | 1         | 63        | 3.46E-02          | 3.91E+00 | +      | 163.2  |
| 1.2.9        | 1         | 70        | 1.51E-03          | 8.12E+00 | *      | 163.2  |
| 1.2.13       | 1         | 52        | 1.58E-02          | 4.27E+00 | +      | 161.7  |
| 1.413        | 1         | 46        | 2.09E-03          | 6.46E+00 | *      | 150.8  |
| 1.551        | 1         | 41        | 2.98E-03          | 6.01E+00 | +      | 143.6  |
| 1.2          | 1         | 29        | 3.80E-02          | 4.66E+00 | +      | 120.2  |
| 1.211        | 1         | 29        | 4.96E-02          | 3.49E+00 | +      | 120.2  |
| 1.451        | 1         | 29        | 4.27E-02          | 3.66E+00 | +      | 120.2  |
| 1.6          | 1         | 29        | 4.42E-02          | 3.70E+00 | +      | 120.2  |
| 1.7          | 1         | 29        | 8.15E-02          | 3.64E+00 | +      | 120.2  |
| 1.4.10       | 1         | 25        | 1.95E-02          | 3.89E+00 | +      | 110.6  |
| 1.2.4        | 1         | 13        | 2.24E-02          | 3.80E+00 | +      | 100.8  |
| 1.121        | 1         | 3         | 1.48E-02          | 4.31E+00 | +      | 85.3   |
| 4.24         | 3         | 75        | 1.91E-02          | 4.57E+00 | +      | 80.8   |
| 4.22         | 3         | 32        | 1.07E-02          | 4.51E+00 | +      | 42.8   |
| 4.26         | 3         | 32        | 7.69E-03          | 5.52E+00 | +      | 42.8   |
| 4.9.6        | 3         | 24        | 4.99E-03          | 5.88E+00 | +      | 27.4   |
| 4.27         | 3         | 13        | 2.49E-02          | 4.11E+00 | +      | 24.2   |
| 5.4.2        | 4         | 66        | 1.47E-02          | 4.35E+00 | +      | 78.5   |
| 5.4.1        | 4         | 24        | 3.50E-02          | 3.53E+00 | +      | 24.7   |
| 7.01         | 6         | 66        | 1.37E-02          | 4.45E+00 | +      | 75.7   |
| 7.33         | 6         | 53        | 4.03E-03          | 4.82E+00 | +      | 71.4   |
| 12.01        | 8         | 41        | 3.88E-02          | 3.52E+00 | +      | 51.1   |
| 21.1         | 17        | 63        | 3.86E-02          | 3.64E+00 | +      | 71.5   |
| 21.7         | 17        | 41        | 6.15E-03          | 4.93E+00 | +      | 43.8   |
| 21.4         | 17        | 3         | 2.81E-02          | 4.04E+00 | +      | 23.8   |
| 21.21        | 17        | 22        | 1.52E-02          | 4.56E+00 | +      | 14.2   |
| 34.2         | 28        | 76        | 4.19E-03          | 6.42E+00 | *      | 57.4   |
| 34.8         | 28        | 36        | 8.73E-03          | 4.21E+00 | +      | 20.6   |
| 46.9.7       | 40        | 74        | 3.40E-02          | 4.34E+00 | +      | 27.9   |
| 47.7.7       | 41        | 74        | 1.68E-03          | 7.38E+00 | *      | 29.1   |
| 47.1.6       | 41        | 57        | 3.74E-03          | 3.50E+00 | +      | 26.1   |
| 47.6.1       | 41        | 57        | 4.87E-03          | 3.83E+00 | +      | 26.1   |
| 47.5.6       | 41        | 50        | 3.07E-03          | 5.60E+00 | +      | 22.3   |

Offspring ID; Mother ID; Assigned father ID; Paternal nonexclusion probability (NEP); Trio LOD score, trio confidence (C) level 80% confidence interval (+) and 95% confidence interval (\*), mother-assigned father distance (D) in kilometers.

**Table S5. Microsatellite summary statistics**

| Locus         | <i>k</i> | N  | <i>H<sub>o</sub></i> | <i>H<sub>e</sub></i> | HW departure | <i>F<sub>is</sub></i> |
|---------------|----------|----|----------------------|----------------------|--------------|-----------------------|
| <i>MFC2</i>   | 21       | 78 | 0.846                | 0.912                | *            | 0.07                  |
| <i>Fsyc02</i> | 7        | 79 | 0.658                | 0.636                | —            | −0.04                 |
| <i>Fsyc06</i> | 10       | 77 | 0.727                | 0.814                | *            | 0.11                  |
| <i>Fsyc08</i> | 12       | 78 | 0.744                | 0.797                | *            | 0.07                  |
| <i>Fsyc09</i> | 7        | 79 | 0.544                | 0.505                | —            | −0.08                 |
| <i>Fsyc13</i> | 4        | 79 | 0.456                | 0.587                | *            | 0.22                  |
| Mean          | 10.167   | —  | 0.663                | 0.708                | —            | 0.06                  |

The locus identity, number of alleles (*k*), number of individuals (N), observed heterozygosity (*H<sub>o</sub>*), expected heterozygosity (*H<sub>e</sub>*), Hardy-Weinberg probability test (HW). Loci showing significant heterozygote deficiency under a sequential Bonferonni correction for multiple comparisons are denoted by \*, and Weir and Cockerham inbreeding coefficient (*F<sub>is</sub>*) both estimated in Genepop 3.4 [Raymond M, Rousset F (1995) Genepop (Version-1.2) - Population genetics software for exact tests and ecumenicism. *Journal of Heredity* 86:248–249.].
